# Supplementary material
Source: HighWire-hosted journal article supplement (https://bmjopen.bmj.com/content/7/8/e014548)
Supplement: inline-supplementary-material-2 [file inline-supplementary-material-2.pdf]

**Supplementary table 2. Association between weight groups of the children at five years of age and early life predictors, early childhood and current health and habits of the children, and current sociodemographic and health characteristics of parents.** These predictors are not significantly associated with the weight groups, and therefore not included in table 2a-c.

| Characteristics                                            | Valid<br>n | All<br>(n = 1088)<br>%      | Underweight<br>(n = 85)<br>% | Normal weight<br>(n = 850)<br>% | Overweight<br>(n = 115)<br>% | Obese<br>(n = 38)<br>%     | p <sup>a)</sup> |
|------------------------------------------------------------|------------|-----------------------------|------------------------------|---------------------------------|------------------------------|----------------------------|-----------------|
| Twins, %                                                   | 1088       | 3.1                         | 3.5                          | 3.1                             | 4.3                          | 0.0                        | 0.60            |
| Chronic malformation or disease <sup>b)</sup>              | 1088       | 2.1                         | 1.2                          | 2.2                             | 0.9                          | 5.3                        | 0.38            |
| Hospital admissions                                        | 1088       | 33.5                        | 35.3                         | 32.5                            | 39.3                         | 34.2                       | 0.53            |
| Breastfed (yes/no)                                         | 1084       | 90.1                        | 89.3                         | 91.0                            | 86.1                         | 83.8                       | 0.20            |
| Physical activity that makes the child sweat <2 times/week | 1049       | 16.2                        | 15.3                         | 17.0                            | 10.1                         | 18.9                       | 0.31            |
| Screen time > 2 hours daily                                | 1065       | 31.6                        | 31.8                         | 31.2                            | 35.7                         | 29.7                       | 0.80            |
| Mother < 20 years at birth                                 | 1088       | 1.7                         | 1.2                          | 1.8                             | 1.7                          | 2.6                        | 0.95            |
| Preeclampsia during pregnancy                              | 749        | 5.7                         | 5.3                          | 5.9                             | 5.3                          | 3.6                        | 0.95            |
| Diabetes during pregnancy <sup>c)</sup>                    | 749        | 1.3                         | 0.0                          | 1.2                             | 4.0                          | 0.0                        | 0.15            |
| Gestational age (days)                                     | 746        | 278.9 (13.59) <sup>d)</sup> | 276.2 (16.8) <sup>d)</sup>   | 279.1 (13.2) <sup>d)</sup>      | 277.7 (13.9) <sup>d)</sup>   | 282.7 (11.9) <sup>d)</sup> | 0.16            |
| Caesarian section                                          | 749        | 16.0                        | 14.0                         | 15.6                            | 24.0                         | 7.1                        | 0.14            |

a) Analyses across weight groups, ANOVA for continuous variables, chi square for categorical; b) Major malformations or diseases, e.g. diabetes, heart disease, celiac disease; c) Both gestational diabetes and type I and II diabetes; d) mean(standard deviation)
